# Supplementary material for: Glia delimit shape changes of sensory neuron receptive endings in C. elegans
Source: Oxford University Press journal article supplement (doi:10.1242/dev.058305), 2011-02-24
Supplement: dev058305tables1.pdf [file dev058305tables1.pdf]

**Table S1. A summary of *ver-1* promoter deletion studies**

| Fragment coordinates*                 | Sheath glia GFP expression at: |      |            |            | Regulated by <i>ttx-1</i> ? <sup>†</sup> |
|---------------------------------------|--------------------------------|------|------------|------------|------------------------------------------|
|                                       | 15°C                           | 25°C | dauer 15°C | dauer 25°C |                                          |
| -2110 to +263 (in-frame)              | -                              | ++   | ++         | ++         | yes                                      |
| -2110 to +262 (-1 frame) <sup>‡</sup> | -                              | ++   | nd         | nd         | nd                                       |
| -2110 to +261 (-2 frame) <sup>‡</sup> | -                              | ++   | nd         | nd         | nd                                       |
| -2110 to -1                           | -                              | -    | nd         | nd         | nd                                       |
| +1 to +263                            | -                              | ++   | ++         | ++         | yes                                      |
| +57 to +263                           | -                              | +    | +          | ++         | yes                                      |
| +112 to +263                          | -                              | -    | -          | +          | yes                                      |
| +130 to +263                          | -                              | -    | -          | +          | yes                                      |
| +170 to +263                          | -                              | -    | -          | -          | nd                                       |
| +201 to +263                          | -                              | -    | -          | -          | nd                                       |
| +1 to +243                            | -                              | +    | +          | ++         | nd                                       |
| +1 to +220                            | -                              | +    | -          | +          | yes                                      |
| +1 to +201                            | -                              | -    | -          | -          | nd                                       |
| +1 to +263 ATTA→GGGG <sup>§</sup>     | -                              | -    | -          | -          | nd                                       |

\*The indicated fragments were fused to *gfp*, introduced into animals and assayed for GFP expression. All constructs were injected at 60 ng/μl with 60 ng/μl pRF4. Coordinates refer to positions relative to the WormBase predicted ATG start codon of *ver-1*.

<sup>†</sup>To test if a *ver-1* reporter was regulated by *ttx-1*, a single array was crossed to *ttx-1(p767)* and scored for reduced GFP intensity.

<sup>‡</sup>Frame-shift reporters probably give GFP expression using the *gfp* start site rather than the *ver-1* start, and demonstrate that regulation of GFP expression by temperature and dauer is transcriptional rather than translational.

<sup>§</sup>The core ATTA nucleotides of the predicted TTX-1 binding site (GGATTATC) are at position +176.

-, no expression; +, weak expression; ++, moderate to high expression; nd, not determined.
