# Supplementary material for: Glia delimit shape changes of sensory neuron receptive endings in C. elegans
Source: Oxford University Press journal article supplement (doi:10.1242/dev.058305), 2011-02-24
Supplement: dev058305tables2.pdf [file dev058305tables2.pdf]

**Table S2. Effects of mutations in genes controlling thermotaxis, neuronal morphology, dauer and the heat-shock/UPR pathways on *ver-1* promoter::*gfp* expression**

| Genotype*                                            | <i>ver-1</i> expression 15°C |           |          | <i>ver-1</i> expression 25°C |                  |          |
|------------------------------------------------------|------------------------------|-----------|----------|------------------------------|------------------|----------|
|                                                      | % PHsh on                    | % AMsh on | <i>n</i> | % PHsh on                    | % AMsh on        | <i>n</i> |
| wild type                                            | 6                            | 0         | 80       | 100                          | 93               | 80       |
| <b>AFD, AIY or AIZ neurons (thermotaxis circuit)</b> |                              |           |          |                              |                  |          |
| <i>ttx-1(p767)</i>                                   | 0                            | 0         | 58       | 2                            | 0                | 51       |
| <i>ttx-1(oy26)</i>                                   | 0                            | 0         | 47       | 0                            | 0                | 44       |
| <i>ceh-14(ch3)</i>                                   | 0                            | 0         | 42       | 96                           | 94               | 50       |
| <i>dac-1(gk211)</i>                                  | 2                            | 0         | 48       | 100                          | 92               | 49       |
| <i>tax-2(p691)</i>                                   | 0                            | 0         | 41       | 100                          | 88               | 50       |
| <i>tax-4(p678)</i>                                   | 2                            | 0         | 46       | 100                          | 83               | 76       |
| <i>pkc-1(nj1)</i>                                    | 5                            | 0         | 40       | 100                          | 88               | 40       |
| <i>pkc-1(nj3)</i>                                    | 3                            | 0         | 40       | 100                          | 95               | 40       |
| <i>pkc-1(nj4)</i>                                    | 5                            | 0         | 40       | 100                          | 95               | 40       |
| <i>pkc-2(ok328)</i>                                  | 8                            | 0         | 40       | 100                          | 95               | 40       |
| <i>ttx-3(ks5)</i>                                    | 5                            | 0         | 39       | 100                          | 80               | 51       |
| <i>ttx-3(mg158)</i>                                  | 2                            | 0         | 40       | 100                          | 95               | 45       |
| <i>lin-11(n389)</i>                                  | 5                            | 0         | 41       | 100                          | 98               | 54       |
| <i>lin-11(n566)</i>                                  | 2                            | 0         | 40       | 100                          | 92               | 50       |
| <i>unc-86(e1416)</i>                                 | 2                            | 0         | 45       | 100                          | 91               | 45       |
| <i>unc-86(n846)</i>                                  | 2                            | 0         | 43       | 100                          | 94               | 54       |
| <b>Otx/otd transcription factors</b>                 |                              |           |          |                              |                  |          |
| <i>ceh-37(ok642)</i>                                 | 10                           | 0         | 40       | 100                          | 85               | 40       |
| <i>ceh-37(ok272)</i>                                 | 10                           | 0         | 40       | 100                          | 83               | 40       |
| <i>ceh-36(ky646)</i>                                 | 20                           | 3         | 40       | 100                          | 98               | 40       |
| <b>Neuronal cilia and dendritic morphology</b>       |                              |           |          |                              |                  |          |
| <i>che-2(e1033)</i>                                  | 0                            | 0         | 55       | 100                          | 86               | 51       |
| <i>che-13(e1805)</i>                                 | 0                            | 0         | 49       | 100                          | 94               | 52       |
| <i>osm-6(p811)</i>                                   | 0                            | 0         | 44       | 100                          | 83               | 48       |
| <i>dyf-7(ns89)</i>                                   | 0                            | 0         | 44       | 88                           | 98               | 50       |
| <i>dyf-7(m537)</i>                                   | 0                            | 0         | 43       | 88                           | 98               | 50       |
| <b>Dauer neuroendocrine pathways</b>                 |                              |           |          |                              |                  |          |
| <i>daf-7(e1372)</i>                                  | 5                            | 0         | 42       | 100 <sup>†</sup>             | 100 <sup>†</sup> | 53       |
| <i>daf-12(m20)</i>                                   | 0                            | 0         | 40       | 100                          | 90               | 50       |
| <i>daf-12(m25)</i>                                   | 0                            | 0         | 54       | 100                          | 90               | 50       |
| <i>daf-2(m41)</i>                                    | 0                            | 0         | 39       | 100 <sup>‡</sup>             | 98 <sup>‡</sup>  | 54       |
| <i>daf-16(mu86)</i>                                  | 5                            | 0         | 40       | 100                          | 100              | 40       |
| <b>Heat-shock and UPR pathways</b>                   |                              |           |          |                              |                  |          |
| wild type                                            | 8                            | 0         | 40       | 93 <sup>§</sup>              | 43 <sup>§</sup>  | 80       |
| <i>ire-1(zc14)</i>                                   | 8                            | 0         | 40       | 98 <sup>§</sup>              | 45 <sup>§</sup>  | 40       |
| <i>hsf-1(sy441)</i>                                  | 13                           | 0         | 40       | 100 <sup>§</sup>             | 53 <sup>§</sup>  | 40       |

\*All strains contained the *ver-1* promoter::*gfp* transgene (*nsls22*).

Animals were scored as adults at the indicated temperature except for:

<sup>†</sup>Dauer-constitutive *daf-7* animals as dauer larvae at 25°C.

<sup>‡</sup>Dauer-constitutive *daf-2* animals as dauer-recovered adults at 25°C.

<sup>§</sup>Owing to increased lethality at high temperatures, *ire-1(zc14)* and *hsf-1(sy441)* animals were cultivated first at 15°C before shifting as L4 larvae to 25°C, and GFP intensity was scored 24 hours later. Wild-type control animals were shifted under the same conditions.

AMsh, amphid sheath; PHsh, phasmid sheath.
