# Supplementary material for: Glia delimit shape changes of sensory neuron receptive endings in C. elegans
Source: Oxford University Press journal article supplement (doi:10.1242/dev.058305), 2011-02-24
Supplement: dev058305tables3.pdf [file dev058305tables3.pdf]

**Table S3. Restoring *ttx-1* expression to *ttx-1(p767)* mutant adults using a heat-inducible promoter rescues *ver-1* expression**

| Genotype*                                          | Heat shock <sup>†</sup> | <i>ver-1</i> expression 15°C |           | <i>ver-1</i> expression 25°C |           |
|----------------------------------------------------|-------------------------|------------------------------|-----------|------------------------------|-----------|
|                                                    |                         | % PHsh on                    | % AMsh on | % PHsh on                    | % AMsh on |
| wild type                                          | –                       | 8                            | 0         | 90                           | 30        |
|                                                    | +                       | 10                           | 0         | 95                           | 40        |
| <i>ttx-1(p767)</i>                                 | –                       | 0                            | 0         | 0                            | 0         |
|                                                    | +                       | 0                            | 0         | 0                            | 0         |
| <i>ttx-1(p767); heat shock::ttx-1a<sup>‡</sup></i> | –                       | 0                            | 0         | 0                            | 0         |
|                                                    | +                       | 13                           | 0         | 55                           | 10        |
| <i>ttx-1(p767); heat shock::ttx-1b<sup>‡</sup></i> | –                       | 0                            | 0         | 0                            | 0         |
|                                                    | +                       | 8                            | 0         | 63                           | 20        |

\*All strains contained the *ver-1* promoter::*gfp* transgene (*nsIs22*).

<sup>†</sup>Animals carrying heat-shock promoter::*ttx-1* arrays were cultivated initially at 15°C. Adult animals were heat shocked at 34°C for 50 minutes and then transferred either to 15°C or 25°C. *ver-1* promoter::*gfp* expression was scored 24 hours later.

<sup>‡</sup>Heat-shock promoter::*ttx-1a* and heat-shock promoter::*ttx-1b* lines used were *nsEx1636* and *nsEx1680*, respectively. *ttx-1a* and *ttx-1b* are described in Table 1.

*n*=40 for all values.

AMsh, amphid sheath; PHsh, phasmid sheath.
